# Supplementary material for: Structural changes of tubulin by interacting with Δ9-tetrahydrocannabinol: in-vitro and theoretical studies
Source: Springer Nature journal article supplement (doi:10.1186/s12868-025-00957-5), 2025-07-30

# **Structural changes of tubulin by interacting with $\Delta^9$ -tetrahydrocannabinol: *in-vitro* and theoretical studies**

Mina Mohammadkhani<sup>1</sup>, Mostafa Jarah<sup>1, 2</sup>, Dariush Gholami<sup>3\*</sup>, Gholamhossein Riazi<sup>1</sup>, Hadi Rezazadeh<sup>4</sup>

\*Correspondence: [d.gholami@ausmt.ac.ir](mailto:d.gholami@ausmt.ac.ir)

<sup>3</sup> Faculty of Biotechnology, Amol University of Special Modern Technologies, Amol, Iran

**Supplementary Figure 1. Full-length gel is presented in Supplementary Figure 1.** Coomassie brilliant blue-stained SDS-PAGE of the extracted and purified tubulin. Protein ladder (lane 1), tubulin dimers prepared from one cycle of polymerization and depolymerization of brain extract (lane 2), and purified tubulin ( $\alpha$ -tubulin and  $\beta$ -tubulin) by phosphocellulose column chromatography (lane 3). The cropped ladder is used to improve the figure clarity.

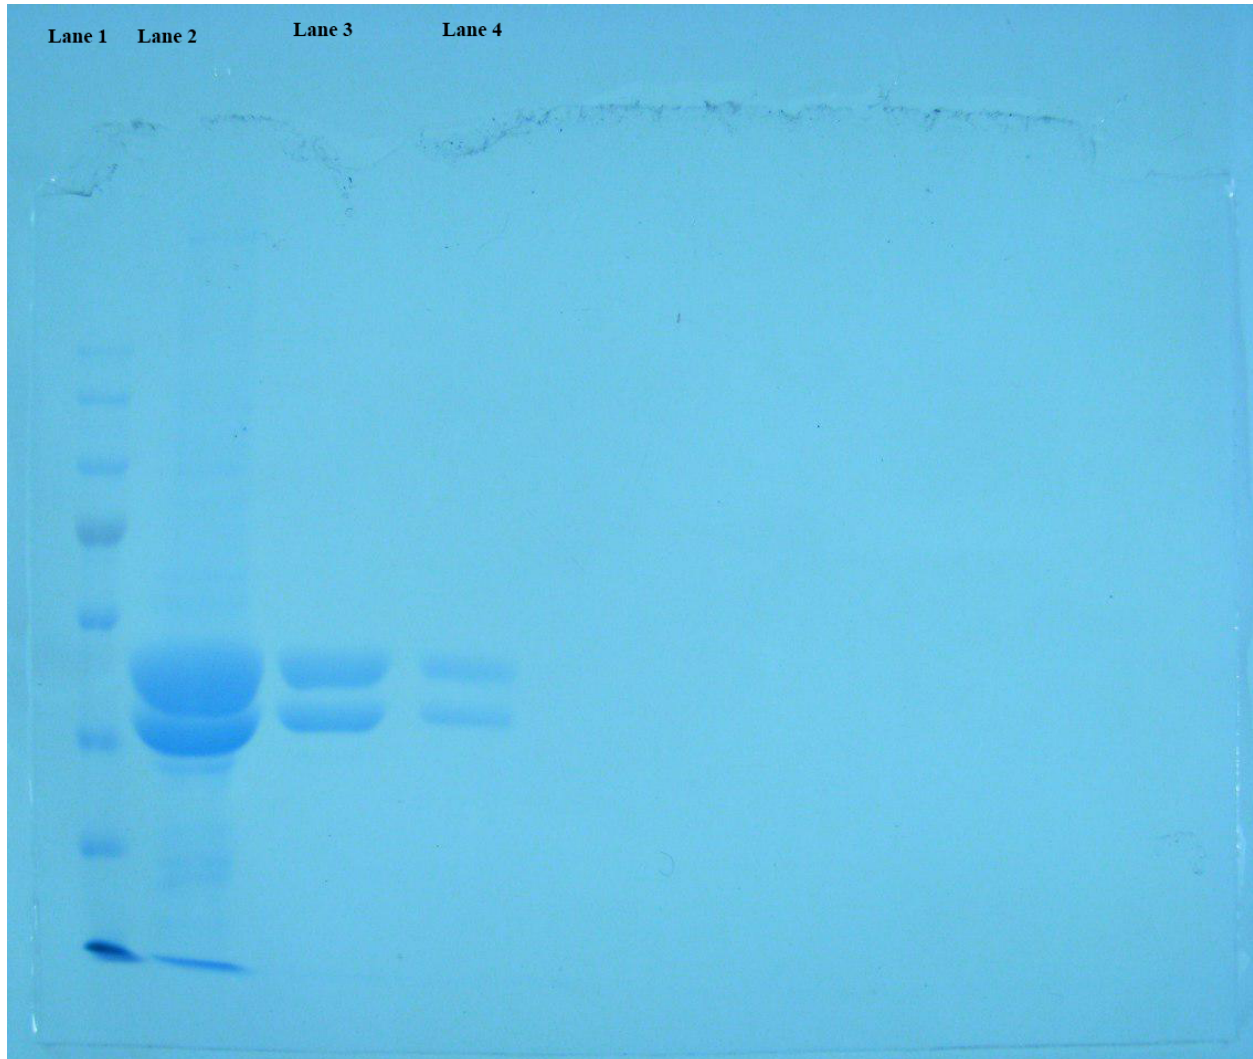

Supplement: MOESM1 [file 12868_2025_957_MOESM1_ESM.pdf]
